# Supplementary material for: Immunogenicity of Endolysin PlyC
Source: MDPI journal article supplement (doi:10.3390/antibiotics11070966), 2022-07-18
Supplement: s1 [file s1]

## Supplementary

**Supplementary Table S1: Demonstration of PlyC antibacterial activity.**

| Bacterial host                                                                                                                                                                                                                                                                                                                                                     | Method(s)                                                                            | Antibacterial activity | Reference                                      |
|--------------------------------------------------------------------------------------------------------------------------------------------------------------------------------------------------------------------------------------------------------------------------------------------------------------------------------------------------------------------|--------------------------------------------------------------------------------------|------------------------|------------------------------------------------|
| group A streptococci<br>( <i>Streptococcus pyogenes</i> )                                                                                                                                                                                                                                                                                                          | Plate assay; native PAGE electrophoresis on agarose embedded with sensitive bacteria | confirmed              | Nelson et al., Proc Natl Acad Sci U S A. 2006  |
| group A streptococci<br>( <i>Streptococcus pyogenes</i> )                                                                                                                                                                                                                                                                                                          | OD600 measurements in isotonic 30% sucrose/PBS w/v buffer                            | confirmed              | Köller et al., Proteomics. 2008                |
| group C streptococci<br>( <i>Streptococcus equi</i> ,<br><i>Streptococcus dysgalactiae</i> )                                                                                                                                                                                                                                                                       | OD600 measurements in PBS                                                            | confirmed              | Hoopes et al., Appl Environ Microbiol. 2009    |
| <i>Streptococcus</i> : <i>S. sobrinus</i> ,<br><i>S. rattus</i> , <i>S. suis</i> , <i>S. pneumoniae</i> ,<br><i>S. oralis</i> , <i>S. mutans</i> , <i>S. agalactiae</i> ,<br><i>Staphylococcus</i> : <i>S. aureus</i> ,<br><i>S. epidermidis</i> , <i>S. hyicus</i> ,<br><i>Bacillus cereus</i> ,<br><i>Enterococcus faecalis</i> ,<br><i>Enterococcus faecium</i> | OD600 measurements in PBS                                                            | not observed           | Hoopes et al., Appl Environ Microbiol. 2009    |
| group A streptococci<br>( <i>Streptococcus pyogenes</i> )                                                                                                                                                                                                                                                                                                          | OD600 measurements and plate count                                                   | confirmed              | Chen et al., Sheng Wu Gong Cheng Xue Bao. 2009 |
| group A streptococci<br>( <i>Streptococcus pyogenes</i> )                                                                                                                                                                                                                                                                                                          | OD600 measurements in PBS (with kinetics)                                            | confirmed              | McGowan et al., Proc Natl Acad Sci U S A. 2012 |
| group A streptococci in biofilm<br>( <i>Streptococcus pyogenes</i> ),                                                                                                                                                                                                                                                                                              | microbiological cultures of bacterial cells recovered from biofilms                  | confirmed              | Shen et al., J Antimicrob Chemother. 2013      |
| group A streptococci, intracellular<br>( <i>Streptococcus pyogenes</i> ),                                                                                                                                                                                                                                                                                          | Co-culture with human epithelial cells and cell counting for recovered bacteria      | confirmed              | Shen et al., Elife. 2016                       |

### References for Supplementary Table S1

Nelson D, Schuch R, Chahales P, Zhu S, Fischetti VA. PlyC: a multimeric bacteriophage lysin. Proc Natl Acad Sci U S A. 2006;103(28):10765-70.

Köller T, Nelson D, Nakata M, Kreutzer M, Fischetti VA, Glocker MO, Podbielski A, Kreikemeyer B. PlyC, a novel bacteriophage lysin for compartment-dependent proteomics of group A streptococci. Proteomics. 2008;8(1):140-8.

Hoopes JT, Stark CJ, Kim HA, Sussman DJ, Donovan DM, Nelson DC. Use of a bacteriophage lysin, PlyC, as an enzyme disinfectant against *Streptococcus equi*. Appl Environ Microbiol. 2009;75(5):1388-94.

Chen W, Wang X, Wang P, Zhang D, Chen H, Ke W, Lu Y, Zhang J. [Expression, purification and characterization of bacteriophage lysin of *Streptococcus* in *Escherichia coli*]. Sheng Wu Gong Cheng Xue Bao. 2009;25(8):1267-72.

McGowan S, Buckle AM, Mitchell MS, Hoopes JT, Gallagher DT, Heselpoth RD, Shen Y, Reboul CF, Law RH, Fischetti VA, Whisstock JC, Nelson DC. X-ray crystal structure of the streptococcal specific phage lysin PlyC. *Proc Natl Acad Sci U S A*. 2012;109(31):12752-7.

Shen Y, Köller T, Kreikemeyer B, Nelson DC. Rapid degradation of *Streptococcus pyogenes* biofilms by PlyC, a bacteriophage-encoded endolysin. *J Antimicrob Chemother*. 2013;68(8):1818-24.

Shen Y, Barros M, Vennemann T, Gallagher DT, Yin Y, Linden SB, Heselpoth RD, Spencer DJ, Donovan DM, Moulton J, Fischetti VA, Heinrich F, Lösche M, Nelson DC. A bacteriophage endolysin that eliminates intracellular streptococci. *Elife*. 2016;5:e13152.

**Supplementary Table S2: Evaluation of anti-PlyC, anti-PlyCA, and anti-PlyCB IgG levels in human sera by normal distribution analysis.** The Anderson-Darling analysis tests the null-hypothesis that a cumulative distribution curve does not vary from expected (i.e., Gaussian distribution). Similarly, the D'Agostino & Pearson analysis tests whether skewness and kurtosis of the data vary significantly from expected in Gaussian distribution.

|                                      | PlyCB   | PlyCA  | PlyC    |
|--------------------------------------|---------|--------|---------|
| <b>Anderson-Darling test</b>         |         |        |         |
| A2                                   | 3.391   | 0.5596 | 4.376   |
| P value                              | <0.0001 | 0.1415 | <0.0001 |
| Passed normality test (alpha=0.05)?  | No      | Yes    | No      |
| <b>D'Agostino &amp; Pearson test</b> |         |        |         |
| K2                                   | 33.64   | 5.251  | 34.13   |
| P value                              | <0.0001 | 0.0724 | <0.0001 |
| Passed normality test (alpha=0.05)?  | No      | Yes    | No      |

**Supplementary Table S3: Correlations of human serum IgG reactivity to PlyC and its domains: PlyC vs. PlyCA (first row), and PlyC vs. PlyCB (second row).**

|       | Spearman r | p-values | CI             | Pearson r | p-values | CI           |
|-------|------------|----------|----------------|-----------|----------|--------------|
| PlyCA | 0.24       | 0.078    | -0.035 to 0.48 | 0.32      | 0.017    | 0.06 to 0.54 |
| PlyCB | 0.82       | <0.0001  | 0.71 to 0.89   | 0.95      | 4.9E-30  | 0.92 to 0.97 |

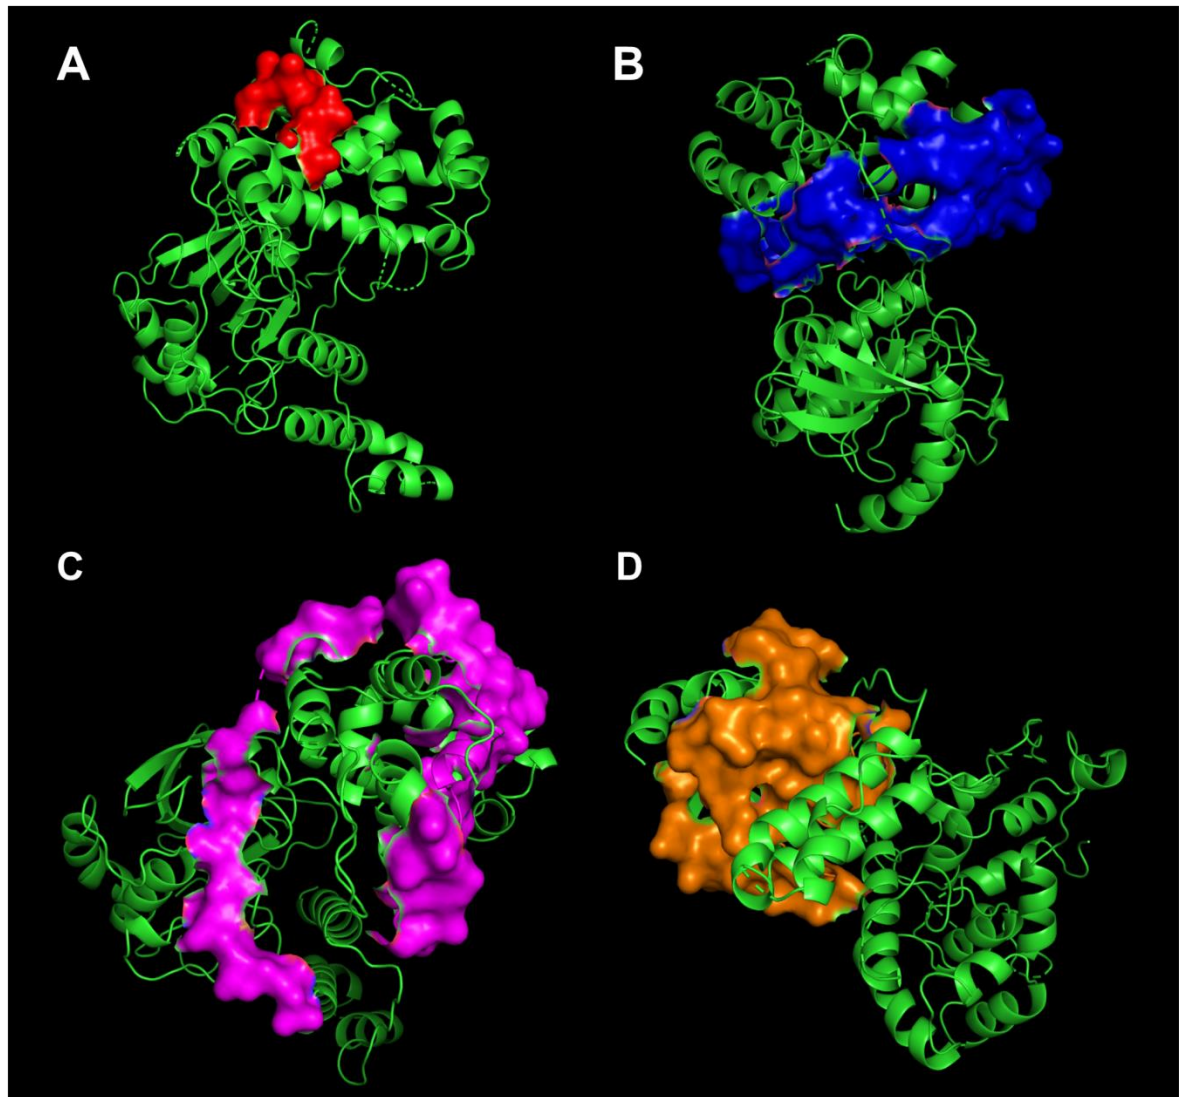

**Supplementary Figure S1: Graphical representation of for immunogenic regions on PlyCA domain.** Immunogenic regions are presented: 1- 9 aa (A), 91-146 aa (B), 171-226 aa (C), 351-406aa (D).

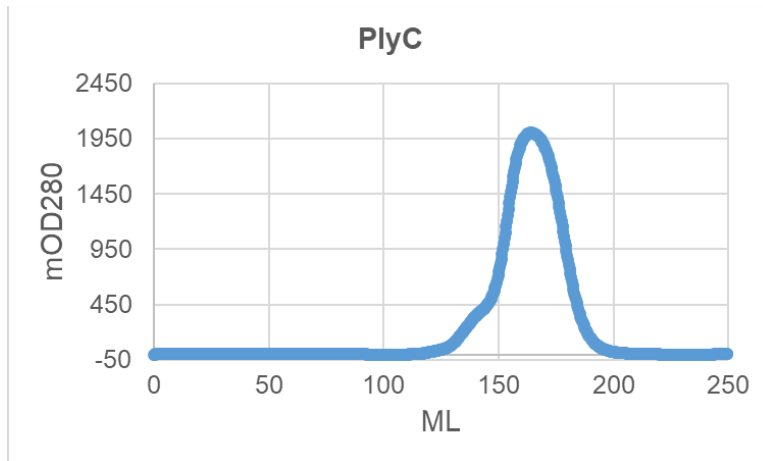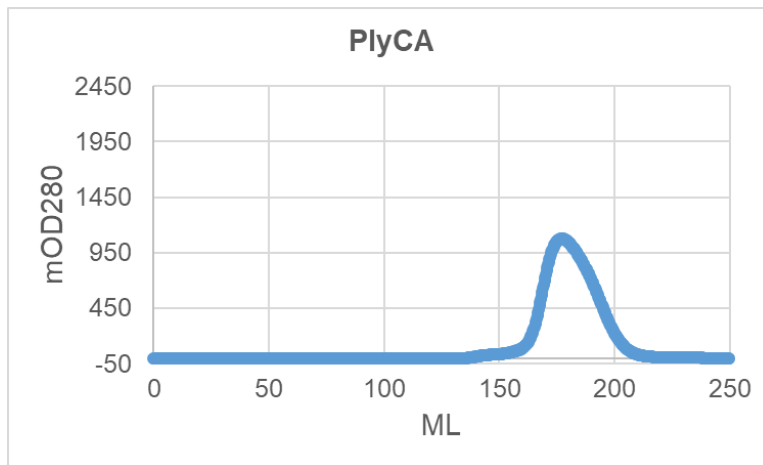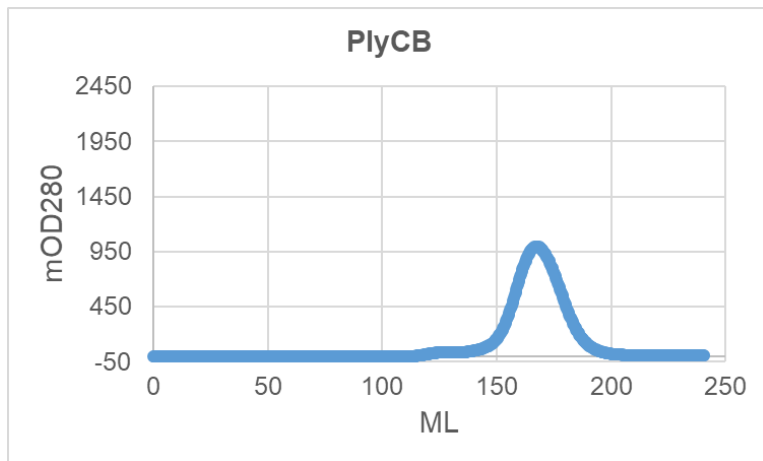

**Supplementary Figure S2: Gel filtration of purified PlyC, PlyCA, and PlyCB.** Purified proteins (10 ml each) were applied to 26/70 Sephacryl S-200 gel filtration column equilibrated in PBS. PlyC is a ~114 kDa holoenzyme composed of one PlyCA and eight PlyCB subunits. PlyCA is a ~50 kDa monomer. PlyCB is a ~64 kDa octamer, composed of eight identical PlyCB (8 kDa) monomers.
